# Supplementary material for: Assessing the Impact of Mindfulness and Life Stress on Maternal Well-Being
Source: Springer Nature journal article supplement (doi:10.1007/s12671-018-0943-y), 2018-04-12

**Supplementary Materials**

**Additional Exploratory Analyses**

We were asked to examine the trajectory of mothers’ dispositional mindfulness over the postnatal period. We first ran an intercept-only model with women’s overall levels of mindfulness as the outcome variable. According to this model, there was significant unexplained within-mother variability in mindfulness levels over time (sigma squared = 0.32, SE = 0.033; Z = 9.76). Then, we added a linear term to the model to examine whether levels of mindfulness changed linearly over time in the sample as a whole. Although the linear slope term was not significant on average, there was significant between-mother variability in these slopes, *χ*2(77) = 147.725, *p* < .001. These results indicate that levels of mindfulness were not static over time; not only did women tend to deviate from their mean across assessment waves (Level 1 variability), but it was also true that women’s mindfulness scores changed in different ways—i.e., some increasing, some decreasing—across waves (Level 2 slope variability). It is therefore plausible to say that, at least for some women, mindfulness is dynamic in nature.

Models controlling for the other symptom type (represented by a grand mean-centered CESD or BAI predictor at Level 1) were also conducted to build on our main effects models and probe the specificity of mindfulness effects to each internalizing syndrome. The effect of dispositional mindfulness on anxiety symptoms was no longer statistically significant when controlling for CESD scores. When BAI scores were controlled in the depressive symptoms model, the effect of dispositional mindfulness on the intercept was marginally significant (β = -.223, *p* = .076), and the within-person effect of dispositional mindfulness remained statistically significant (β = -.336, *p* < .001).

**Additional Figures**

*Figure 1.* Maternal BAI scores across study sessions. Error bars depict +/- 1 Standard Error.


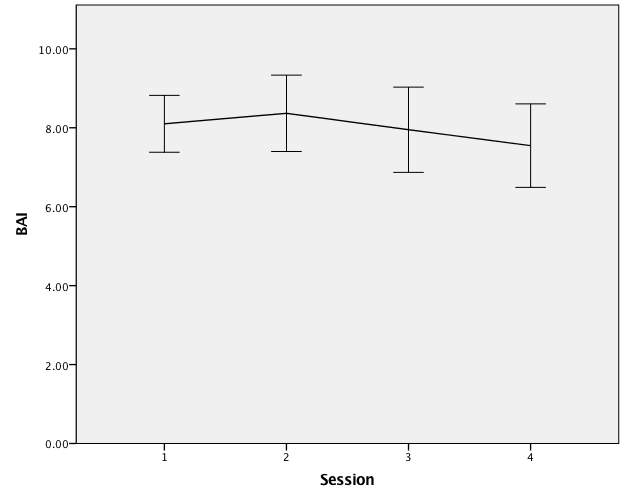


*Figure 2.* Maternal CESD scores across study sessions. Error bars depict +/- 1 Standard Error.


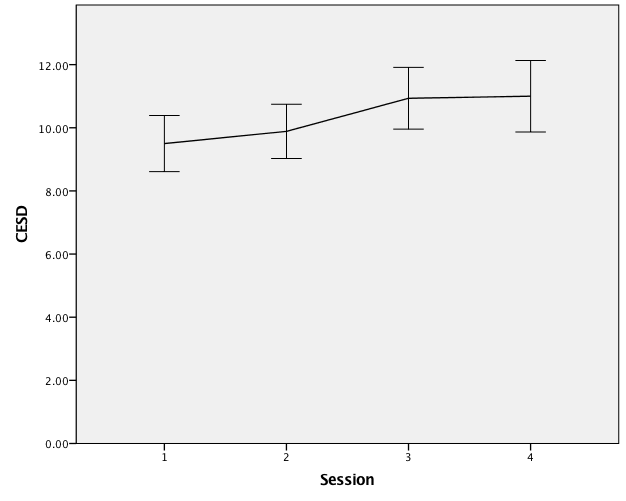

Supplement: MOESM1 [file 15656598]
